# Supplementary material
Source: PubMed Central journal article supplement (PMC4751867)
Supplement: NIHMS756100-supplement-Supplement_1.pdf [file NIHMS756100-supplement-Supplement_1.pdf]

## Supplement 1

This assay employs NPY antiserum that shows 100 % cross-reactivity with NPY (human and rat), and less than 0.02% cross-reactivity to known NPY-related peptides. Authentic NPY standards were used to plot a ten-point standard curve using concentrations ranging from 0-5 ng/ml for quantification of samples. The assay sensitivity was 40 pg/ml with an intra-assay variation of <6%.

The CSF NPY concentrations we observed are in close agreement with those reported previously by most (1-7), although not all (8-9), investigators.

- 1 Altemus M, Jacobson KR, Debellis M, Kling M, Pigott T, Murphy DL, and Gold PW (1999): Normal CSF oxytocin and NPY levels in OCD. *Biol Psychiatry* 45: 931-933.
- 2 Gjerris A, Widerlov E, Werdelin L, and Ekman R (1992) Cerebrospinal fluid concentrations of Neuropeptide Y in depressed patients and in controls. *Journal of Psychiatric Neuroscience* 17: 23-27.
- 3 Nam S-Y, Kratzsch J, Kim K W, Kim K-R, Lim S-K, Marcus C (2001): Cerebrospinal fluid and plasma concentrations of Leptin, NPY, and alpha-MSH in obese women and their relationship to negative energy balance. *Journal of Endocrinology and Metabolism* 86: 4849-4853.
- 4 Nikisch G, Agren H, Eap CB, Czernik A, Baumann P, and Mathe AA (2005) Neuropeptide Y and corticotropin releasing hormone in CSF mark response to antidepressive treatment with citalopram. *Int. J. Neuropsychopharmacol* 8: 403-410.
- 5 Olsson A, Regnell G, Traskman-bendz L, Ekman R, Westrin A (2004): Cerebrospinal fluid neuropeptide Y and substance P in suicide attempters during long-term antidepressant treatment. *European Neuropsychopharmacol* 14: 479-485.
- 6 von Holst H, Rudehill A, Lundberg JM (1991): Neuropeptide Y levels in central and peripheral cerebrospinal fluid in patients with intracranial disorders. *Acta Neurochir (Wien)*. 112: 132-135.
- 7 Widerlov E, Lindstrom LH, Wahlestedt C, Ekman R (1988): Neuropeptide Y and Peptide YY as possible cerebrospinal fluid markers for major depression and schizophrenia, respectively. *J. Psy. Res.* 22: 69-79.
- 8 Hou C, Jia F, Liu Y, Li L (2006): CSF serotonin, 5-hydroxyindolacetic acid and neuropeptide Y levels in sever major depressive disorder. *Brain Research* 1095: 154-158.
- 9 Heilig M, Zachrisson O, Thorsell A, Ehnvall A, Mottagui-Tabar S, Sjogren M, Asberg M, Ekman R, Wahlestedt C, Agren H (2004): Decreased cerebrospinal fluid neuropeptide Y (NPY) in patients with treatment refractory unipolar major

depression: preliminary evidence for association with preproNPY gene polymorphism. *J. Psy. Res.* 38: 113-121.
